# Supplementary material for: Exploration of the NaxMoO2phase diagram for low sodium contents (x≤ 0.5)
Source: Royal Society of Chemistry journal article supplement (doi:10.1039/c8ta04224a), 2018-01-01
Supplement: c8ta04224a1.pdf [file c8ta04224a1.pdf]

## Exploration of the $\text{Na}_x\text{MoO}_2$ Phase Diagram for Low Sodium Contents ( $x \leq 0.5$ )

Laura Vitoux,<sup>a</sup> Marie Guignard,<sup>\*a</sup> Jacques Darriet<sup>a</sup> and Claude Delmas<sup>a</sup>

<sup>a</sup> CNRS, Univ. Bordeaux, Bordeaux INP, ICMCB UMR 5026, F-33600 Pessac, France. Email : marie.guignard@icmcb.cnrs.fr.

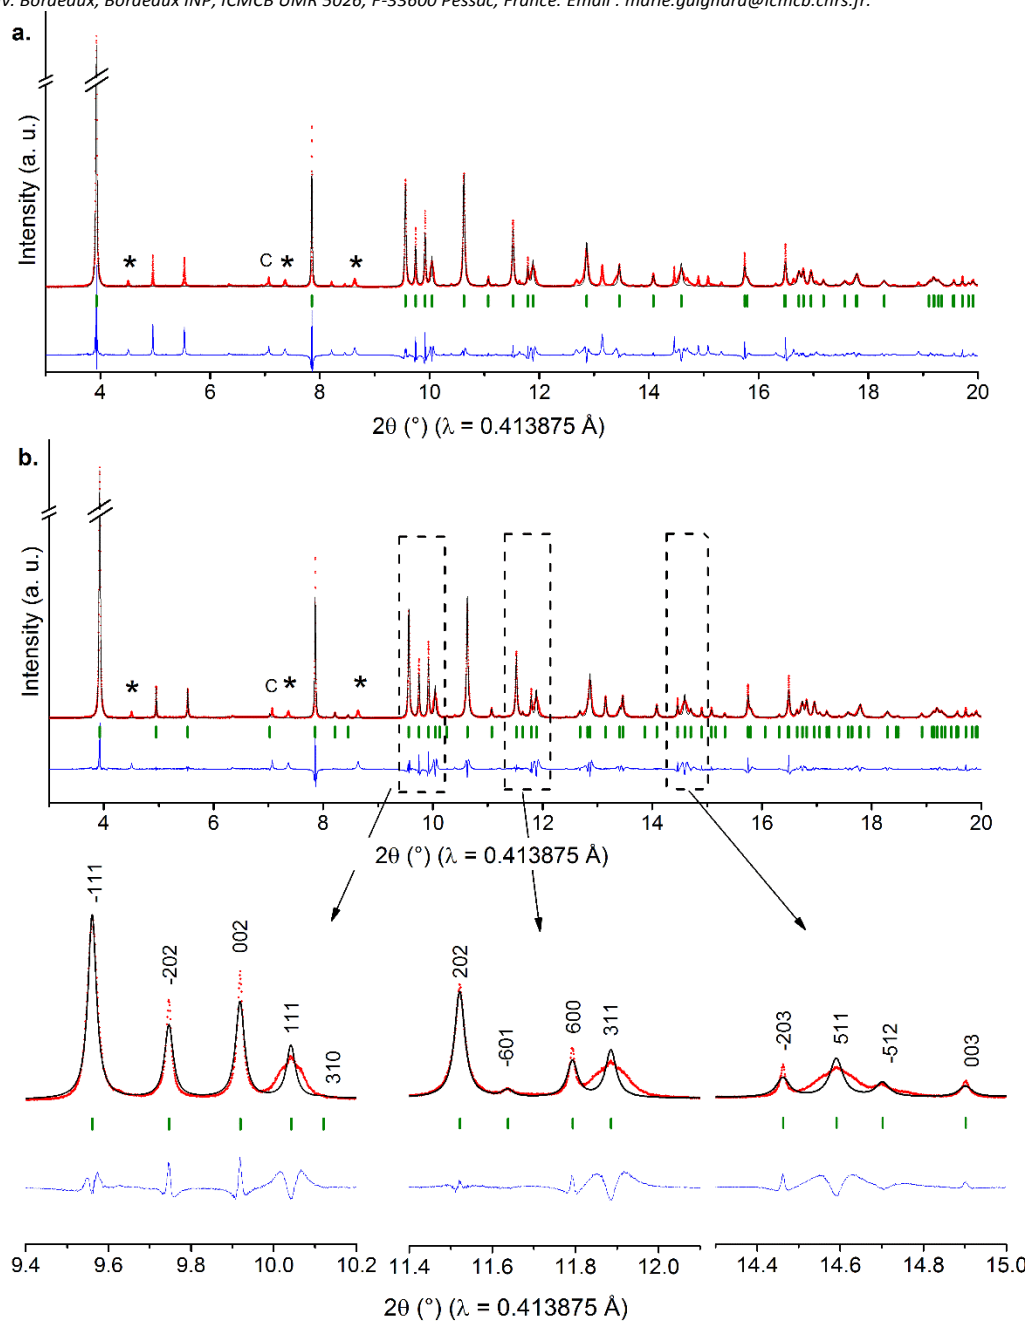

Figure S1: Experimental high resolution X-ray powder diffraction pattern of  $\text{Na}_{0.5}\text{MoO}_2$  (red diamonds), calculated pattern obtained from the Le Bail refinement (black line) considering the O'3 monoclinic subcell (a), the monoclinic supercell (b).

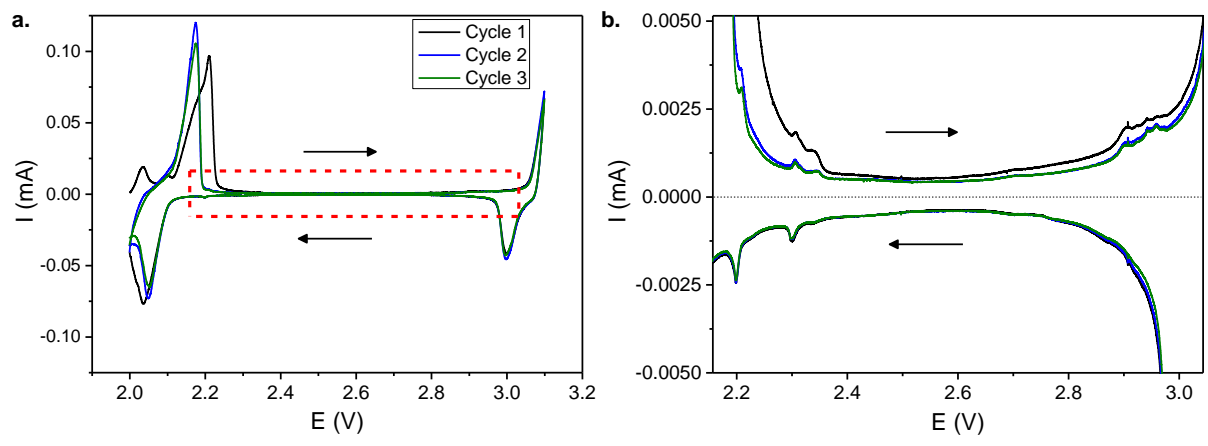

Figure S2: Cyclic voltammetry curves of a sodium battery made with  $\text{Na}_{2/3}\text{MoO}_2$  at the positive electrode cycled between 2.0 V and 3.1 V at  $6\mu\text{V/s}$ .
